# Supplementary material
Source: MDPI journal article supplement (https://www.mdpi.com/2079-6439/9/11/69)

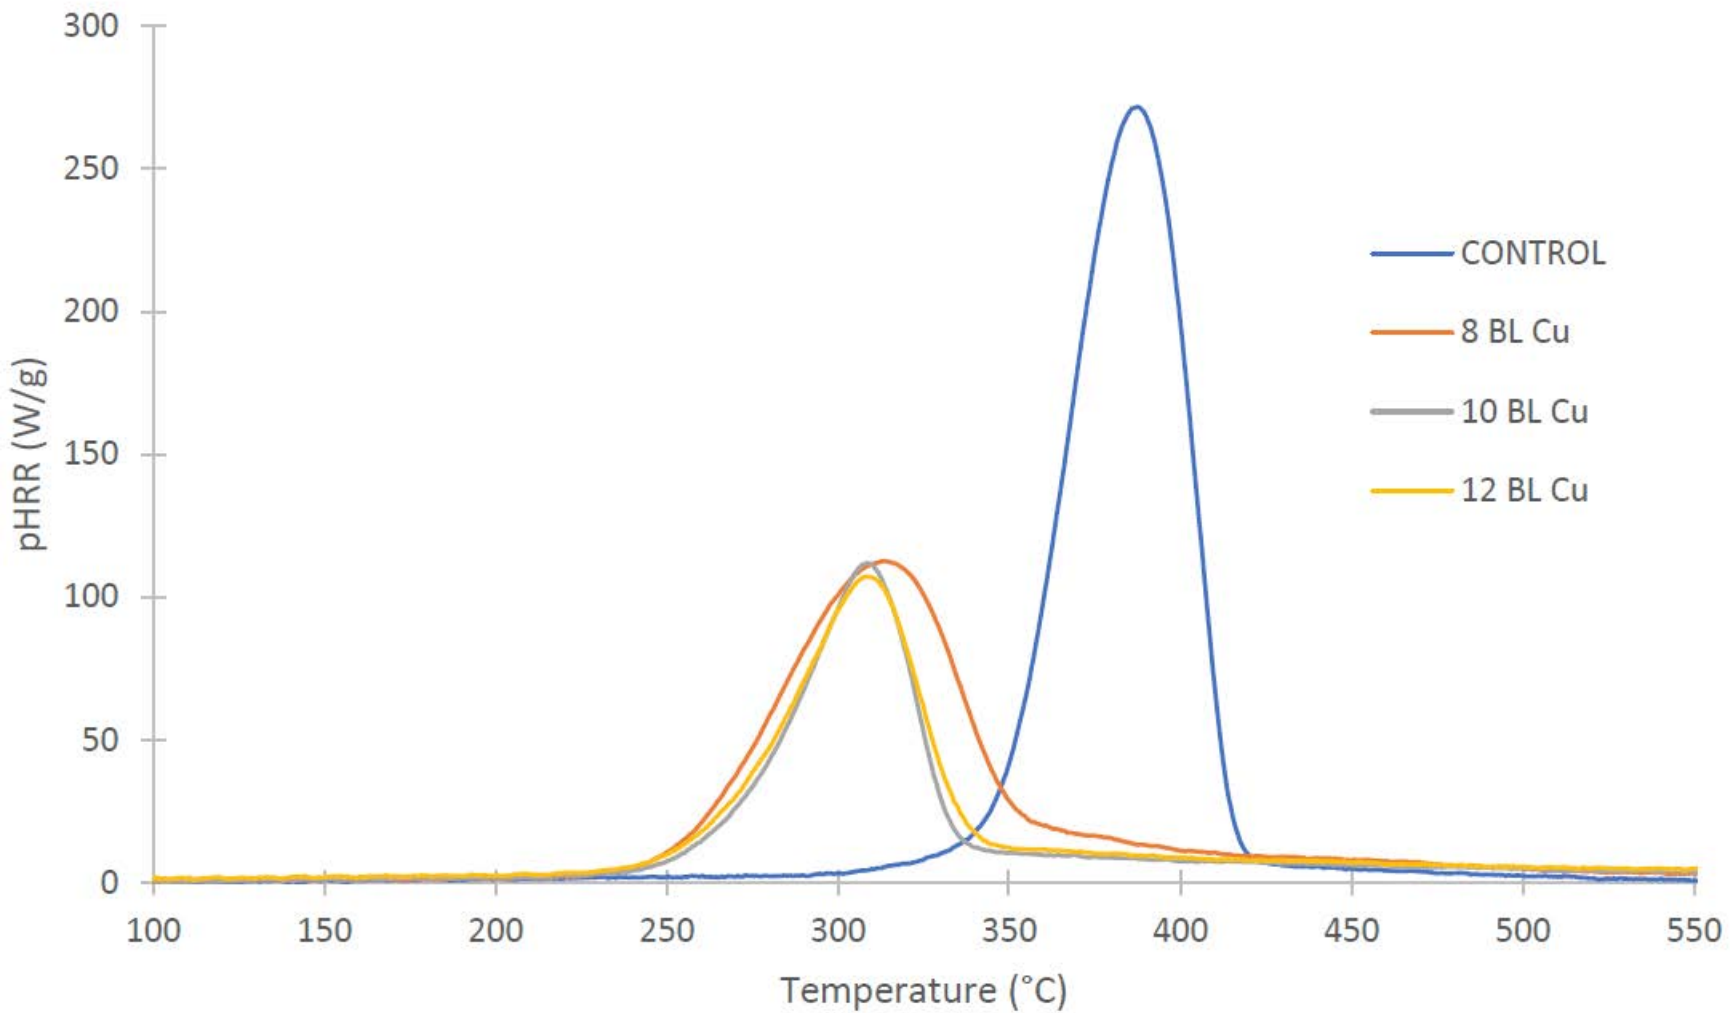

Supplement: s1 [file s1]
